# Supplementary material for: Effectiveness of Clinical Pharmacist Service on Drug-Related Problems and Patient Outcomes for Hospitalized Patients with Chronic Kidney Disease: A Randomized Controlled Trial
Source: MDPI journal article supplement (doi:10.3390/jcm10081788), 2021-04-20
Supplement: s1 [file s1]

**Table S1.** Drug-related problems (DRPs) according to pharmacotherapy indications in intervention group implemented clinical pharmacist service during hospitalization.

| Indication                             | MEM service |                      | dPCT service |                      | Main contents of indication-specific recommendation by clinical pharmacists                                                                                                                                                                                                                                                                                                                                                                                                                       |
|----------------------------------------|-------------|----------------------|--------------|----------------------|---------------------------------------------------------------------------------------------------------------------------------------------------------------------------------------------------------------------------------------------------------------------------------------------------------------------------------------------------------------------------------------------------------------------------------------------------------------------------------------------------|
|                                        | DRPs, n (%) | Resolved DRPs, n (%) | DRPs, n (%)  | Resolved DRPs, n (%) |                                                                                                                                                                                                                                                                                                                                                                                                                                                                                                   |
| Mineral bone disease                   | 36 (19.8)   | 31 (86.1)            | 7 (15.6)     | 3 (42.9)             | <ul style="list-style-type: none"> <li>- Addition, discontinuation, or dosage adjustment of phosphate-binding agents, vitamin D or calcimimetics according to blood phosphorus, calcium, PTH, or 25(OH)D levels;</li> <li>- Change the administration time of phosphate-binding agents;</li> <li>- Blood test for the evaluation of phosphate-binding agents or calcimimetics use;</li> <li>- Dosage reduction of phosphate-binding agents based on the maximum daily dose of calcium.</li> </ul> |
| Hypertension/ cardiovascular disorders | 34 (18.7)   | 28 (82.4)            | 5 (11.1)     | 2 (40.0)             | <ul style="list-style-type: none"> <li>- Addition, discontinuation, or dosage adjustment of antihypertensive drug therapy according to the blood pressure level;</li> <li>- Change the administration time of antithrombotic agents owing to surgery or procedure.</li> </ul>                                                                                                                                                                                                                     |
| Anemia                                 | 24 (13.2)   | 18 (75.0)            | 7 (15.6)     | 3 (42.9)             | <ul style="list-style-type: none"> <li>- Blood test for the evaluation of ESA, or iron preparation use;</li> <li>- Start, or discontinue ESA or iron supplement based on the hemoglobin levels, transferrin saturation or serum ferritin levels;</li> <li>- Dosage adjustment of ESA according to hemoglobin level.</li> </ul>                                                                                                                                                                    |
| Hyperuricemia                          | 13 (7.1)    | 11 (84.6)            | 4 (8.9)      | 3 (75.0)             | <ul style="list-style-type: none"> <li>- Addition, discontinuation, or dosage adjustment of xanthine oxidase inhibitors based on the serum uric acid or CrCl levels;</li> <li>- Discontinue colchicine based on patient symptoms.</li> </ul>                                                                                                                                                                                                                                                      |
| Gastrointestinal disorders             | 15 (8.2)    | 12 (80.0)            | 1 (2.2)      | 0                    | <ul style="list-style-type: none"> <li>- Start laxatives for the prevention or treatment of constipation;</li> <li>- Start, or discontinue acid suppression therapy, promotility agents or digestive enzymes;</li> <li>- Start proton-pump inhibitors owing to high-dose corticosteroid use;</li> <li>- Renal dosing of histamine H<sub>2</sub> antagonists.</li> </ul>                                                                                                                           |
| Metabolic acidosis                     | 11 (6.0)    | 11 (100.0)           | 0            | NA                   | <ul style="list-style-type: none"> <li>- Addition, discontinuation, or dosage adjustment of sodium bicarbonate based on plasma total CO<sub>2</sub> level.</li> </ul>                                                                                                                                                                                                                                                                                                                             |
| Infections                             | 8 (4.4)     | 8 (100.0)            | 3 (6.7)      | 3 (100.0)            | <ul style="list-style-type: none"> <li>- Renal dosing of antimicrobial agents.</li> </ul>                                                                                                                                                                                                                                                                                                                                                                                                         |
| Fluid retention                        | 8 (4.4)     | 6 (75.0)             | 2 (4.4)      | 0                    | <ul style="list-style-type: none"> <li>- Start or discontinue diuretics based on patient symptoms such as oedema or urine output;</li> <li>- Change thiazide diuretics to loop diuretics in patients with CrCl &lt;30 mL/min;</li> <li>- Hold diuretics before a coronary angioplasty procedure.</li> </ul>                                                                                                                                                                                       |
| Dyslipidemia                           | 6 (3.3)     | 3 (50.0)             | 8 (17.8)     | 5 (62.5)             | <ul style="list-style-type: none"> <li>- Addition or dosage adjustment of an HMG-CoA reductase inhibitor based on blood lipoprotein concentrations.</li> </ul>                                                                                                                                                                                                                                                                                                                                    |
| Nutritional disorders                  | 6 (3.3)     | 4 (66.7)             | 1 (2.2)      | 0                    | <ul style="list-style-type: none"> <li>- Start multivitamins with an insurance coverage in patients receiving dialysis.</li> </ul>                                                                                                                                                                                                                                                                                                                                                                |
| Disorders of electrolyte               | 5 (2.7)     | 5 (100.0)            | 0            | NA                   | <ul style="list-style-type: none"> <li>- Addition, discontinuation, or dosage adjustment of potassium chloride or a potassium-lowering agent</li> </ul>                                                                                                                                                                                                                                                                                                                                           |

|                        |                |            |               |           |                                                                                                                                                                                                                                                                                |
|------------------------|----------------|------------|---------------|-----------|--------------------------------------------------------------------------------------------------------------------------------------------------------------------------------------------------------------------------------------------------------------------------------|
| homeostasis            |                |            |               |           |                                                                                                                                                                                                                                                                                |
| Hyperglycemia          | 3 (1.6)        | 3 (100.0)  | 0             | NA        | - according to the blood potassium level.<br>- Change to antidiabetic drugs that do not require dosage adjustment according to kidney function;<br>- Resume or discontinue metformin according to S <sub>Cr</sub> level.                                                       |
| Immune disorders       | 3 (1.6)        | 2 (66.7)   | 1 (2.2)       | NA        | - Blood test for TDM of calcineurin inhibitors;<br>- Discontinuation or dosage adjustment of calcineurin inhibitors according to TDM.                                                                                                                                          |
| Neurological disorders | 2 (1.1)        | 1 (50.0)   | 1 (2.2)       | 0         | - Renal dosing of pregabalin or gabapentin.                                                                                                                                                                                                                                    |
| Others                 | 8 (4.4)        | 6 (75.0)   | 5 (11.1)      | 4 (80.0)  | - Discontinue adsorptive carbon based on S <sub>Cr</sub> level owing to insurance coverage;<br>- Start or discontinue dermal corticosteroids or oral antihistamines based on the symptom of pruritus;<br>- Renal dosing of histamine H <sub>1</sub> antagonists or analgesics. |
| Total                  | 182<br>(100.0) | 149 (81.9) | 45<br>(100.0) | 23 (51.1) |                                                                                                                                                                                                                                                                                |

---

Abbreviation: CrCl, creatinine clearance; dPCT, discharge pharmaceutical care transition; ESA, erythropoiesis-stimulating agents; MEM, medication evaluation and management; NA, not applicable; PTH, parathyroid hormone; Scr, serum creatinine; TDM, therapeutic dose monitoring.
